# Supplementary material
Source: PubMed Central journal article supplement (PMC4851923)
Supplement: NIHMS746628-supplement.pdf [file NIHMS746628-supplement.pdf]

## SUPPLEMENTARY FIGURE CAPTIONS

**Supplementary Figure 1.** Overview of the WT human MTERF1 structure (PDB:3MVA) solved to 2.2Å. The three nucleotides involved in the base flipping event are colored magenta and labeled.

**Supplementary Figure 2.** T3243 spontaneously flips-in during unrestrained MD simulations. (A) The crystal structure showing F243 and R162 as green sticks. In the final 40ps of this simulation, the interaction energy between F243 and T3243 was -1.2kcal/mol and between F243 and C3242 was -3.8 kcal/mol. (B) T3243 flips back into the pseudo duplex, forming a t-stacking interaction with F243 and a second t-stacking interaction with C3242.

**Supplementary Figure 3.** (A) An overlay of wild type (gray) and the R162A substitution (yellow and orange), demonstrating a t-stacking interaction between Phe243 and T3243 that is absent in the wild type structure and the formation of a hydrogen bond between O2 of T3243 and N4 of Arg195. (B) The Y288A substitution structure shows that Phe243 stacks with both C3242 and T3243 simultaneously in the heavy strand.

**Supplementary Figure 4.** Phe243 and Phe322 sequence conservation information analysis using sequence logos <sup>[1,2]</sup>.

## SUPPLEMENTARY TABLE CAPTION

**Supplementary Table 1.** Summary of alterations to the flipped bases for the wild-type (WT) system and the four mutants. Legend: I, intrahelical; X, extrahelical; termination efficiency colored from maximal to minimal (red to white to blue).

## REFERENCES

- [1] Schneider TD, Schneider TD, Stephens RM, Stephens RM. Sequence logos: a new way to display consensus sequences. *Nucleic Acids Res* 1990;18:6097–100.
- [2] Crooks GE, Crooks GE, Hon G, Hon G, Chandonia J-M, Chandonia J-M, et al. WebLogo: a sequence logo generator. *Genome Res* 2004;14:1188–90.

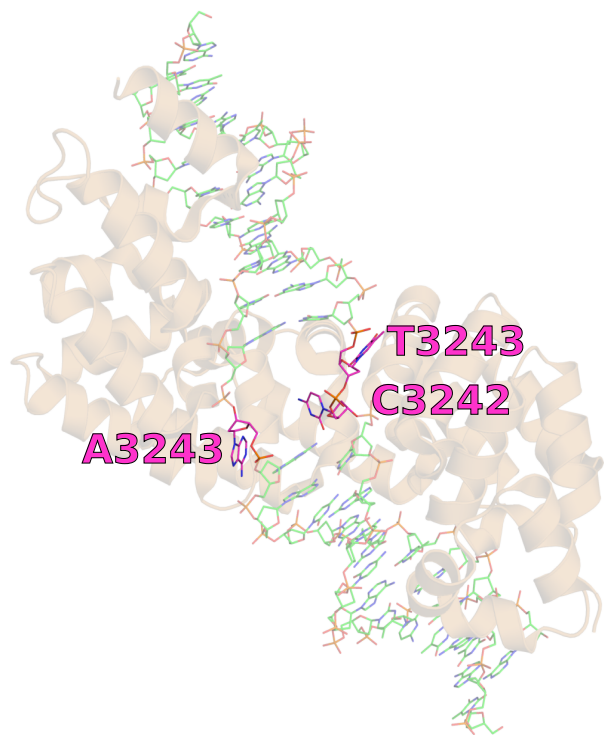

Supplementary Figure 1 Byrnes, et al.

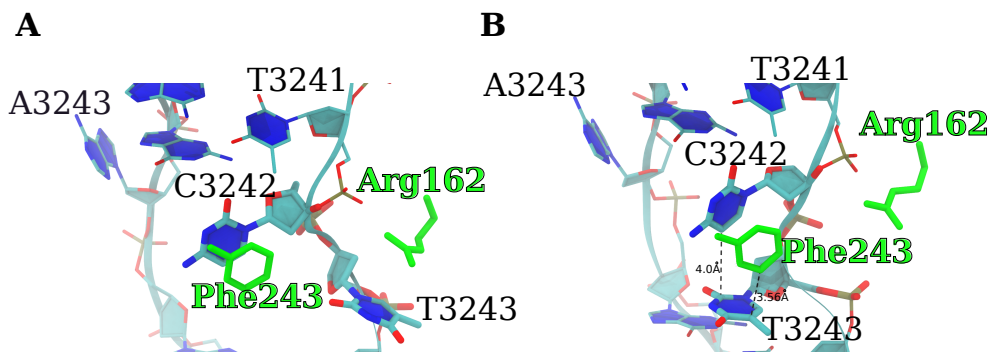

Supplementary Figure 2 Byrnes, et al.

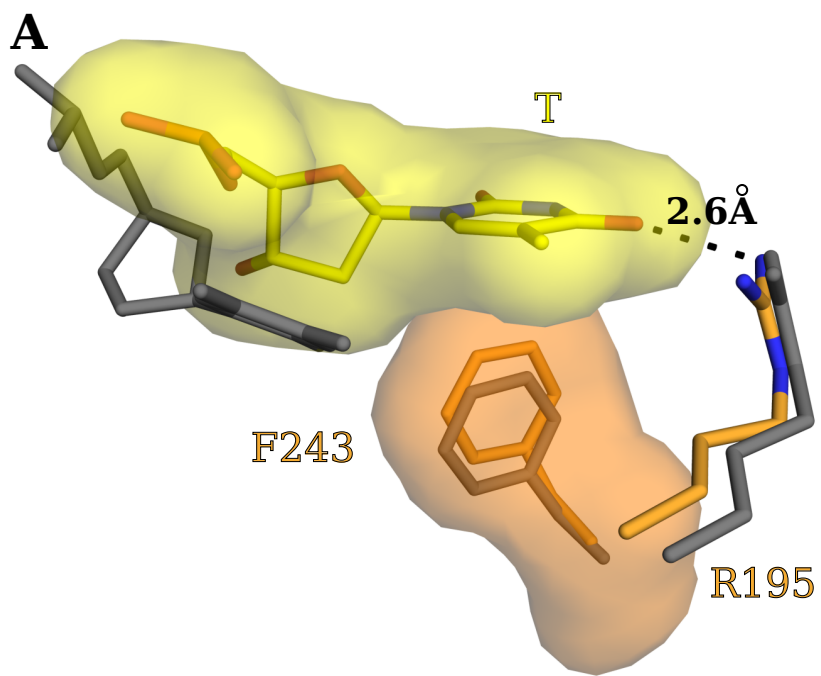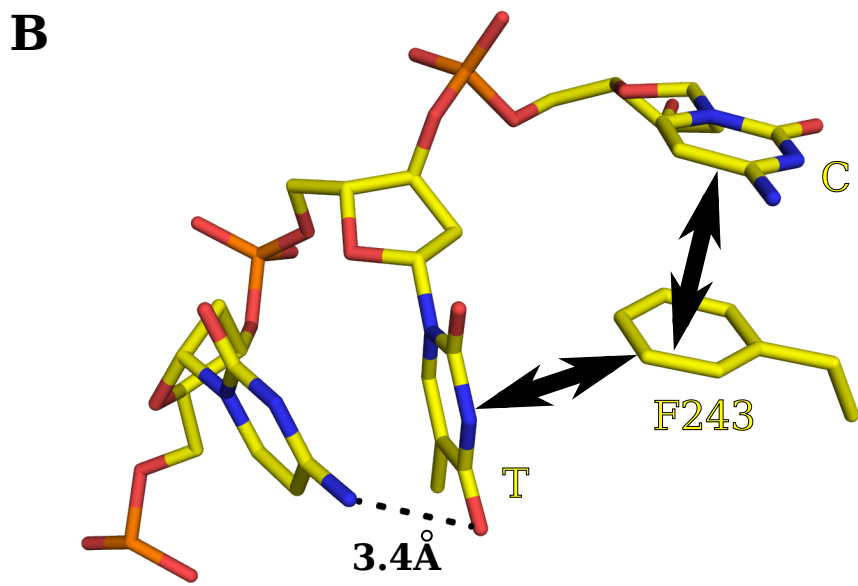

Supplementary Figure 3 Byrnes, et al.

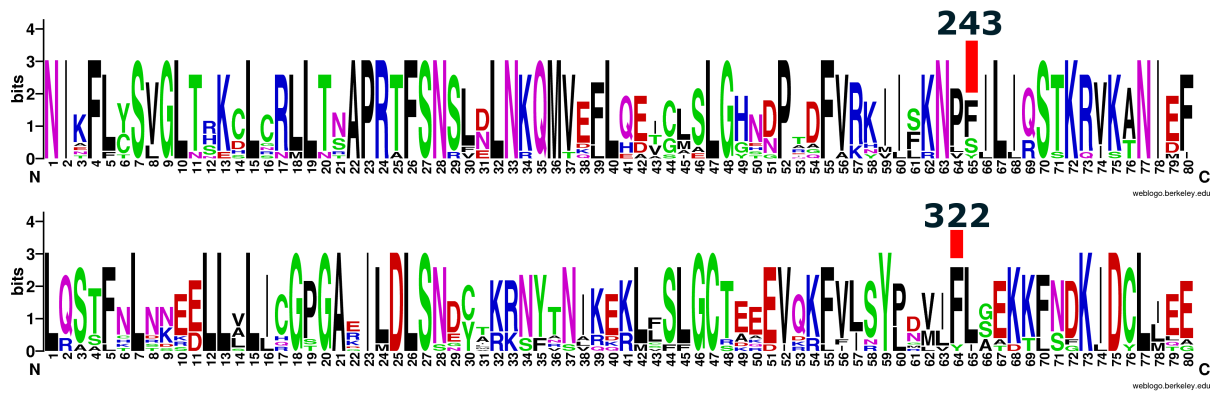

Supplementary Figure 4 Byrnes, et al.
